# Supplementary material for: Electrochemical Sensing Platform Based on Metal Nanoparticles for Epinephrine and Serotonin
Source: MDPI journal article supplement (doi:10.3390/bios13080781), 2023-08-01
Supplement: s1 [file s1]

Supplementary Materials

# Electrochemical Sensing Platform based on Metal Nanoparticles for epinephrine and serotonin

Sorina Alexandra Leau <sup>1,2</sup>, Cecilia Lete <sup>1,\*</sup>, Cristian Matei <sup>3</sup> and Stelian Lupu <sup>2,\*</sup>

<sup>1</sup> Department of Electrochemistry and Corrosion, Institute of Physical Chemistry “Ilie Murgulescu” of the Romanian Academy, 202 Splaiul Independentei, 060021 Bucharest, Romania

<sup>2</sup> Department of Analytical Chemistry and Environmental Engineering, Faculty of Chemical Engineering and Biotechnologies, University “Politehnica” of Bucharest, 1-7 Polizu Gheorghe, 060042 Bucharest, Romania

<sup>3</sup> Department of Inorganic, Physical Chemistry and Electrochemistry, Faculty of Chemical Engineering and Biotechnologies, University “Politehnica” of Bucharest, 1-7 Polizu Gheorghe, 060042 Bucharest, Romania

\* Correspondence: e-mail@e-mail.com; [stelian.lupu@upb.ro](mailto:stelian.lupu@upb.ro) (S.L.); [clete@icf.ro](mailto:clete@icf.ro) (C.L.)

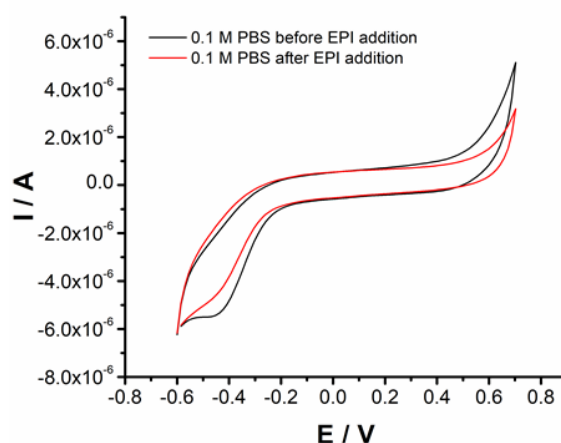

**Figure S1.** CVs recorded at GCE-PEDOT-AuNPs sensing platform in 0.1 M PBS of pH 7 before and after epinephrine analysis protocol. Potential scan rate: 50 mV/s.

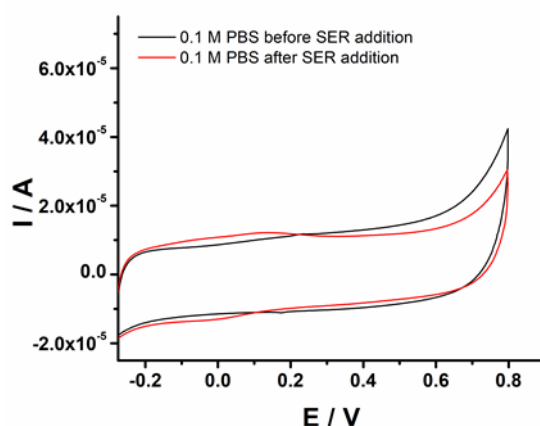

**Figure S2.** CVs recorded at GCE-PEDOT-AuNPs sensing platform in 0.1 M PBS of pH 7 before and after serotonin analysis protocol. Potential scan rate: 50 mV/s.

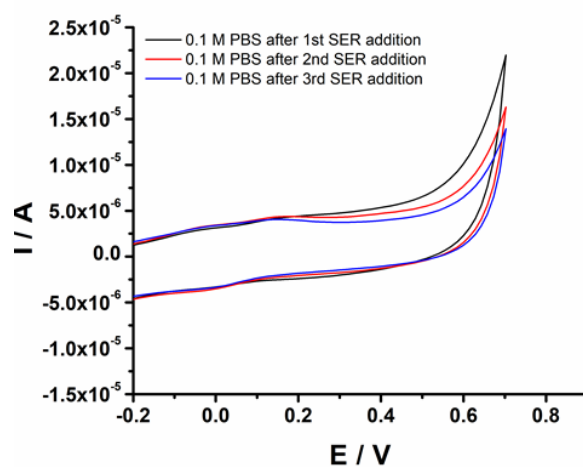

**Figure S3.** CVs recorded at GCE-PEDOT-AuNPs sensing platform in 0.1 M PBS of pH 7 after 3 consecutive serotonin measurements. Potential scan rate: 50 mV/s.

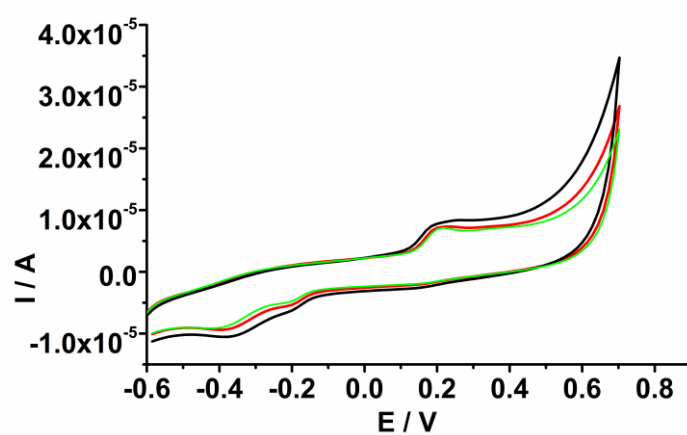

**Figure S4.** CVs recorded at GCE-PEDOT-AuNPs sensing platform in 0.1 M PBS of pH 7 containing 160  $\mu$ M epinephrine at different time intervals of 1 (black), 5 (red), and 10 (green) hours. Potential scan rate: 50 mV/s.

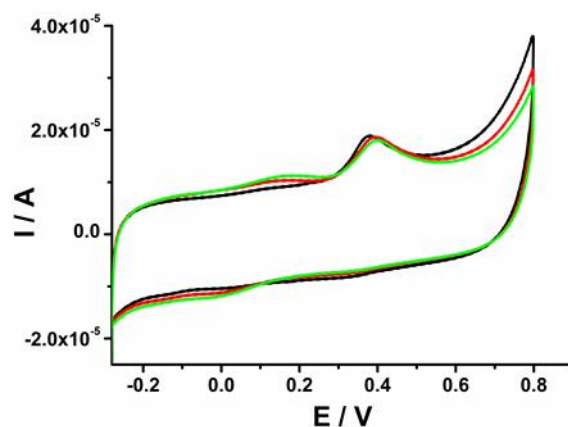

**Figure S5.** CVs recorded at GCE-PEDOT-AuNPs sensing platform in 0.1 M PBS of pH 7 containing 160  $\mu$ M serotonin at different time intervals of 1 (black), 5 (red), and 10 (green) hours. Potential scan rate: 50 mV/s.
